# Supplementary material
Source: publisher figshare collection journal article supplement (https://rs.figshare.com/ndownloader/files/17086031)
Supplement: Supplementary file 1 [file 17086031]

## Sheet: Sheet1
Santos, PKF; Arias, MC; Kapheim, KM. (2019) Loss of developmental diapause as prerequisite for social evolution in bees - published at Biology Letters
Table S1: Table of the species used for correlation and ancestral reconstruction analysis. For each species were assined: sociality (1- solitary, 2- social); phase (diapause phase: 1- development, 2- adult, 3- reproductive, 4- no diapause and 5- plastic); nest type (1- ground, 2- cavity); voltinism (1- univoltine, 2- multivoltine); latitude degrees: the latitude of the place of collection of the …
Species	Sociality	Phase	Nest	Voltinism	LatitudeDegrees	Date (Mya)	Classification	References
Hesperapis_rhodocerata	1	1	1	1	31	33	Hesperapini	Rozen Jr., 1987; Mello et al., 2018
Meganomia_binghami	1	1	1	1	21	21	Meganomiinae	Rozen Jr., 1977
*Andrena_rudbeckiae	1	5	1		30	52	Andreninae	Neff and Simpson, 1997
*Andrena_accepta	1	1	1		31	52	Andreninae	Rozen Jr., 1973
Andrena_vaga	1	2	1	1	48	52	Andreninae	Fellendorf et al., 2004
Euherbstia_excellens	1	1	1	1	30	52	Andreninae	Rozen Jr., 1993
*Perdita_nuda	1	1	1		42	45	Panurginae	Torchio, 1975
Perdita_floridensis	1	1	1	1	27	45	Panurginae	Norden et al., 2003
Perdita_octomaculata	1	1	1	1	42	45	Panurginae	Eickwort, 1977
*Macrotera_portalis	1	1	1			45	Panurginae	Danforth, 1999
*Calliopsis_larreae	1	1	1		36	45	Panurginae	Rust, 1988
*Calliopsis_zebrata	1	1	1		35	45	Panurginae	Rozen Jr., 2008
Rhophitulus_xenopalpus	1	4	1	2	26	45	Panurginae	Rozen Jr., 2014
Cephalurgus_anomalus	1	4	1	2	23	45	Panurginae	Rozen Jr., 1989
Liphanthus_alicahue	1	4	1	2	27	45	Panurginae	Rozen Jr., 1989
Panurginus_albopilosus	1	1	1	2	33	45	Panurginae	Rozen Jr., 1971
Sphecodosoma_dicksoni	1	1	1	2	33	65	Rophitinae	Rozen Jr., 1993
Dufourea_novaeangliae	1	1	1	1	43	65	Rophitinae	Eickwort et al., 1986
*Nomia_melanderi	1	1	1			33	Nomiinae	Cross and Bohart, 1960
*Nomia_nevadensis	1	1	1		39	33	Nomiinae	Cross and Bohart, 1960
Nomia_triangulifera	1	1	1	1	39	33	Nomiinae	Cross and Bohart, 1960
Megalopta_genalis	2	4	2	2	9	28	Augochlorini	Kapheim et al., 2011
Augochlora_pura	1	2	2	2	38	20	Augochlorini	Stockhammer, 1966
Augochlorella_aurata	2	2	1	2	42	20	Augochlorini	Mueller, 1996; Coelho et al., 2004
Paroxystoglossa_jocasta	1	2	1	2	25	20	Augochlorini	Michener and Lange, 1958
Agapostemon_virescens	1	2	1	1	42	12	Halictini	Abrams and Eickwort, 1981
Halictus_farinosus	2	2	1	2	41	20	Halictini	Nye, 1980
Halictus_ligatus	2	2	1	2	43	20	Halictini	Richards and Packer, 1994
Halictus_rubicundus	2	2	1	2	40	20	Halictini	Yanega, 1988, 1989
*Halictus_rubicundus1	1	2	1	1	38	20	Halictini	Eickwort et al., 1996
Halictus_scabiosae	2	2	1	2	46	20	Halictini	Ulrich et al., 2009
*Lasioglossum_texanum	2	2	1		41	33	Halictini	Chandler, 1960
*Lasioglossum_baleicum	1	2	1	2	43	33	Halictini	Yagi and Hasegawa, 2012
Lasioglossum_baleicum1	2	2	1	2	43	33	Halictini	Cronin and Hirata, 2003
*Lasioglossum_baleicum2	1	2	1	1	43	33	Halictini	Cronin and Hirata, 2003
Lasioglossum_duplex	2	2	1	2	43	33	Halictini	Sakagami and Fukuda, 1972
Lasioglossum_vulsum	1	2	1	1	33	33	Halictini	Miyanaga, 2017
*Lasioglossum_calceatum	1	2	1	1	50	33	Halictini	Davison and Field, 2016
Lasioglossum_calceatum1	2	2	1	2	50	33	Halictini	Davison and Field, 2016
Lasioglossum_coeruleum	2	2	2	2	38	33	Halictini	Stockhammer, 1967
Lasioglossum_laevissimum	2	2	1	2	39	33	Halictini	Batra, 1987
Lasioglossum_lineatulum	2	2	1	2	42	33	Halictini	Eickwort, 1986
Lasioglossum_lusorium	1	2	1	2	41	33	Halictini	Bohart, 1976
Lasioglossum_oenotherae	1	2	1	1	43	33	Halictini	Knerer and MacKay, 1969
*Lasioglossum_malachurum	2	2	1		37	33	Halictini	Richards 2000
Lasioglossum_rohweri	2	2	1	2	38	33	Halictini	Breed, 1976
Lasioglossum_versatum	2	2	1	2	38	33	Halictini	Michener, 1966
*Sphecodes_sp.	1	1	1		42	47	Sphecodini	Torchio, 1975
*Sphecodes_pimpinellae	1	2	1		38	47	Sphecodini	Ordway, 1964
Ptiloglossa_arizonensis	1	1	1	1	31	40	Diphaglossinae	Rozen Jr., 1984
Leioproctus_huakiwi	1	1	1	1	43	15	Paracolletini	Donovan et al., 2010
*Hylaeus_asininus	1	1	2		31	30	Hylaeinae	Krombein, 1967
Hylaeus_modestus	1	1	2	1	42	30	Hylaeinae	Krombein, 1967
*Fidelia_villosa	1	1	1		26	87	Fideliini	Rozen Jr., 1970
*Pararhophites_orobinus	1	1	1		28	65	Pararhophitini	Rozen Jr., 1990
Lithurgopsis_apicallis	1	1	2	1	31	30	Lithurginae	Rozen Jr. and Hall, 2014
Microthurge_corumbae	1	1	2	2	21	30	Lithurginae	Garofalo et al., 1992
Trachusa_larreae	1	1	1	1	31	39	Anthidiini	Rozen Jr. and Hall, 2012
*Stelis_ater	1	1	2		29		Anthidiini	Rozen Jr. and Hall, 2011
Anthidium_maculosum	1	1	2	2	31	39	Anthidiini	Krombein, 1967
Dianthidium_floridiense	1	1	2	1	27	39	Anthidiini	Krombein, 1967
Dianthidium_heterulkei_fraternum	1	1	2	2	31	39	Anthidiini	Krombein, 1967
Dianthidium_ulkei_perterritum	1	1	2	2	31	39	Anthidiini	Krombein, 1967
*Megachile_assumptionis	1	1	1		19	19	Megachilini	Martins and de Almeida, 1994
Megachile_gentilis	1	1	2	2	31	19	Megachilini	Krombein, 1967
Megachile_mendica	1	1	2	2	36	19	Megachilini	Krombein, 1967
*Megachile_centuncularis	1	1	2		43	19	Megachilini	Krombein, 1967
Megachile_concinna	1	1	2	2	33	19	Megachilini	Krombein, 1967
Megachile_rotundata	1	1	2	2	38	19	Megachilini	Krombein, 1967
Megachile_xylocopoides	1	1	2	2	36	19	Megachilini	Krombein, 1967
Megachile_inimica	1	1	2	2	31	19	Megachilini	Krombein, 1967
*Megachile_policaris	1	1	2		31	19	Megachilini	Krombein, 1967
*Megachile_georgica	1	1	2		27	19	Megachilini	Krombein, 1967
*Megachile_exilis	1	1	2		27	19	Megachilini	Krombein, 1967
*Megachile_campanulae	1	1	2		43	19	Megachilini	Krombein, 1967
Megachile_pseudanthidioides	1	1	2	2	27	19	Megachilini	Zillikens and Steiner, 2004
*Megachile_subexilis	1	1	2		34	19	Megachilini	Krombein, 1967
*Coelioxys_gilensis	1	1	2		34	19	Megachilini	Krombein, 1967
*Chelostoma_philadelphi	1	1	2		38	48	Osmiini	Krombein, 1985
Hoplitis_anthocopoides	1	1	2	1	42	48	Osmiini	Eickwort, 1975
*Ashmeadiella_clypeodentata	1	1	2		31	48	Osmiini	Krombein, 1967
*Ashmeadiella_bigeloviae	1	1	2		31	48	Osmiini	Krombein, 1967
Ashmeadiella_cactorum	1	1	2	2	33	48	Osmiini	Krombein, 1967
Ashmeadiella_meliloti	1	1	2	2	31	48	Osmiini	Krombein, 1967
*Ashmeadiella_opuntiae	1	1	2		31	48	Osmiini	Krombein, 1967
*Heriades_leavitti	1	1	2		27	48	Osmiini	Krombein, 1967
*Heriades_carinata	1	1	2		36	48	Osmiini	Krombein, 1967
*Protosmia_rubifloris	1	2				48	Osmiini	Michener, 2007
Osmia_lignaria	1	2	2	1	38	48	Osmiini	Krombein, 1967
Osmia_bicornis	1	2	2	1	49	48	Osmiini	Radmacher and Strohm, 2010
Osmia_bucephala	1	2	2	1	38	48	Osmiini	Krombein, 1967
*Osmia_coerulescens	1	2	2		43	48	Osmiini	Krombein, 1967
*Osmia_glauca	1	2	2		39	48	Osmiini	Rust and Clement, 1972
Osmia_latreillei	1	1	2	1	30	48	Osmiini	Shebl et al., 2018
Osmia_pumila	1	2	2	1	38	48	Osmiini	Krombein, 1967
*Osmia_montana	1	5	2	1	41	48	Osmiini	Torchio and Tepedino, 1982
*Osmia_californica	1	5	2	1	41	48	Osmiini	Torchio and Tepedino, 1982
*Osmia_iridis	1	5	2	1	41	48	Osmiini	Torchio and Tepedino, 1982
*Osmia_cornuta	1	2	2		41	48	Osmiini	Bosch, 1994
*Osmia_sculleni	1	2	2		41	48	Osmiini	Parker and Tepedino, 1982
*Anthophora_abrupta	1	1	1		40	60	Anthophorini	Frison, 1922
*Anthophora_pacifica	1	2				60	Anthophorini	Michener, 2007
*Anthophora_peritomae	1	1	1		41	60	Anthophorini	Torchio, 1971
Amegilla_dawsoni	1	1	1	1	23	60	Anthophorini	Houston, 1991
*Habropoda_miserabilis	1	2	1			60	Anthophorini	Michener, 2007
*Ericrocis_lata	1	1	1		31	38	Ericrocidini	Mello et al., 2018
*Brachynomada_roigi	1	1	1		28	37	Brachyonomadini	Rozen Jr., 1994
*Kelita_toroi	1	1	1		30	37	Brachyonomadini	Rozen Jr., 1994
*Triepeolus	1	1	1		31	30	Epeolini	Rozen Jr., 1984
*Epeolus_pusillus	1	1	1		41	30	Epeolini	Rozen Jr. and Favreau, 1968
Tetrapedia_diversipes	1	1	2	2	23	12	Tetrapedia	Alves-dos-Santos, 2002
Manuelia_postica	1	2	2	1	35	47	Manuelini	Flores-Prado et al., 2008
*Exoneurella_lawsoni	2	5	2	2	20	25	Allodapini	Michener, 1964
*Xylocopa_virginica	2	2	2			42	Xylocopini	Ackerman, 1916
Xylocopa_fenestrata	2	2	2	2	29	42	Xylocopini	Sihag, 1993
Ceratina_calcarata	2	2	2	1	51	38	Ceratinini	Rehan and Richards, 2010
*Ceratina_megastigmata	2	2	2		36	38	Ceratinini	Katayama, 1994
Ceratina_accusator	2	4	2	2	1	38	Ceratinini	Rehan et al., 2009
Ceratina_nigrolateralis	2	4	2	2	1	38	Ceratinini	Rehan et al., 2009
Ceratina_dentipes	2	4	2	2	1	38	Ceratinini	Rehan et al., 2009
Ceratina_smaragdula	2	4	2	2	1	38	Ceratinini	Rehan et al., 2009
Ceratina_japonica	2	2	2	1	39	38	Ceratinini	Sakagami and Maeta, 1984
*Exomalopsis_sidae	1	1	1			50	Exomalopsini	Rozen Jr. and Snelling, 1986
Exomalopsis_nitens	1	1	1	2	33	50	Exomalopsini	Rozen Jr. and Snelling, 1986
Diadasia_rinconis	1	1	1	2	30	40	Emphorini	Neff and Simpson, 1992
*Ptilothrix_plumata	1	1	1		19	40	Emphorini	Martins and de Almeida, 1994
Canephorula_apiformis	1	1	1	2	31	35	Eucerini	Michelette et al., 2000
Epicharis_zonata	1	1	1	1	5	72	Centridini	Roubik and Michener, 1980
Centris_flavifrons	1	1	2	2	7	72	Centridini	Martins et al., 2013
Centris_tarsata	1	1	2	2	12	72	Centridini	Aguiar and Garofalo, 2004
Euglossa_melanotricha	2	4	2	2	6	15	Euglossini	Martins et al., 2018
Euglossa_cordata	2	4	2	2	6	15	Euglossini	Martins et al., 2018; Freiria et al., 2017
Eulaema_bombiformis	1	4	2	2	6	13	Euglossini	Martins et al., 2018
*Eufriesea_auriceps	1	1	2		6	12	Euglossini	Martins et al., 2018
Eufriesea_smaragdina	1	1	2	1	27	12	Euglossini	Kamke et al., 2008
Exaerete_dentata	1	1	2	1	27	17	Euglossini	Kamke et al., 2008
Apis_cerana_cerana	2	3	2	2	43	22	Apini	Sakagami and Kouta, 1958
*Apis_mellifera1	2	4	2	2	23	22	Apini
Apis_mellifera	2	3	2	2	50	22	Apini	Van Nerum and Buelens, 1997
Bombus_diversus	2	2	1	2	35	24	Bombini	Miyamoto, 1960
Bombus_atrattus	2	4	1	2	21	24	Bombini
Bombus_huntii	2	2	1	2	41	24	Bombini	Xu et al., 2013
Bombus_ignitus	2	2	1	2	35	24	Bombini	Yoon et al., 2013
Bombus_terrestris	2	2	1	2	46	24	Bombini	Sadd et al., 2015
Bombus_impatiens	2	2	1	2	46	24	Bombini	Sadd et al., 2015
Plebeia_droryana	2	3	2	2	23	22	Meliponini	Dos-Santos, 2014
Plebeia_emerina	2	3	2	2	23	22	Meliponini	Dos-Santos, 2014
Plebeia_julianii	2	3	2	2	25	22	Meliponini	Dos-Santos, 2014
Plebeia_witmanni	2	3	2	2	30	22	Meliponini	Dos-Santos, 2014
Plebeia_saiqui	2	3	2	2	30	22	Meliponini	Dos-Santos, 2014
Plebeia_nigriceps	2	3	2	2	30	22	Meliponini	Dos-Santos, 2014
Plebeia_remota	2	3	2	2	23	22	Meliponini	Dos-Santos, 2014; Ribeiro, 2003
Melipona_marginata	2	3	2	2	21	22	Meliponini	Dos-Santos, 2014
Melipona_obscurior	2	3	2	2	30	22	Meliponini	Dos-Santos, 2014
Melipona_quadrifasciata	2	3	2	2	21	22	Meliponini	Dos-Santos, 2014
Melipona_bicolor_shencki	2	3	2	2	30	22	Meliponini	Dos-Santos, 2014
Melipona_alsivai	2	3	2	2	10	22	Meliponini	Do Nascimento and Nascimento, 2012
Trigona_ventralis_hoozana	2	3	2	2	23	22	Meliponini	Dos-Santos, 2014
Tetragonisca_angustula	2	4	2	2	23	22	Meliponini	personal_communication (Sheina Koffler)
Scaptotrigona_depilis	2	4	2	2	23	22	Meliponini	personal_communication (Sheina Koffler)
References:
Abrams J, Eickwort GC (1981) Nest switching and guarding by the communal sweat bee Agapostemon virescens (Hymenoptera, Halictidae). Insectes Soc 28:105–116. doi: 10.1007/BF02223699
Ackerman AJ (1916) The carpenter-bees of the United States of the genus Xylocopa. J New York Entomol Soc 24:196–232.
Aguiar CML, Garófalo CA (2004) Nesting biology of Centris (Hemisiella) tarsata Smith (Hymenoptera, Apidae, Centridini). Rev Bras Zool 21:477–486.
Alves-dos-Santos I, Melo GAR, Rozen Jr. JG (2002) Biology and immature stages of the bee tribe Tetrapediini (Hymenoptera: Apidae). Am Museum Novit 3377:1–45.
Batra SW (1987) Ethology of the vernal eusocial bee, Dialictus laevissimus (Hymenoptera: Halictidae). J Kansas Entomol Soc 60:100–108.
Bohart GE (1976) The biology and behavior of Evylaeus galpinsiae Cockerell (Hymenoptera: Halictidae). Wasmann J Biol 34:185–234.
Bosch J (1994) The nesting behaviour of the mason bee Osmia cornuta (Latr) with special reference to its pollinating potential (Hymenoptera, Megachilidae). Apidologie 25:84–93. doi: 10.1051/apido:19940109
Breed MD (1976) The evolution of social behavior in primitively social bees: a multivariate analysis. Evolution (N Y) 30:234–240.
Chandler L (1960) Light trap collections of the nocturnal bee, Sphecodogastra texana (Cresson)(Hymenoptera, Halictidae). Indiana Acad Sci 124–129.
Coelho BWT (2004) A review of the bee genus Augochlorella (Hymenoptera: Halictidae: Augochlorini). Syst Entomol 29:282–323. doi: 10.1111/j.0307-6970.2004.00243.x
Cronin AL, Hirata M (2003) Social polymorphism in the sweat bee Lasioglossum (Evylaeus) baleicum (Cockerell) (Hymenoptera, Halictidae) in Hokkaido, northern Japan. Insectes Soc 50:379–386. doi: 10.1007/s00040-003-0693-1
Cross EA, Bohart GE (1960) The biology of Nomia (Epinomia) triangulifera with comparative notes on other species of Nomia. Univ Kansas Sci Bull 41:761–792.
Danforth BN (1999) Emergence dynamics and bet hedging in a desert bee, Perdita portalis. Proc R Soc B Biol Sci 266:1985–1994.
Davison PJ, Field J (2016) Social polymorphism in the sweat bee Lasioglossum (Evylaeus) calceatum. Insectes Soc 63:327–338. doi: 10.1007/s00040-016-0473-3
Do Nascimento DL, Nascimento FS (2012) Extreme effects of season on the foraging activities and colony productivity of a stingless bee (Melipona asilvai Moure, 1971) in northeast Brazil. Psyche (Stuttg) 2012:1–6. doi: 10.1155/2012/267361
Donovan BJ, Howlett BG, Walker MK (2010) Relocation and establishment of nesting populations of the native bee Leioproctus huakiwi Donovan (Hymenoptera: Colletidae). New Zeal Entomol 33:109–113. doi: 10.1080/00779962.2010.9722198
Dos-Santos CF, Nunes-Silva P, Halinski R, Blochtein B (2014) Diapause in Stingless Bees (Hymenoptera: Apidae). Sociobiology 61:369–377. doi: 10.13102/sociobiology.v61i4.369-377
Eickwort GC (1977) Aspects of the Nesting Biology and Descriptions of Immature Stages of Perdita octomaculata and P . halictoides (Hymenoptera:Andrenidae). J Kansas Entomol Soc 50:577–599.
Eickwort GC (1986) First steps into Eusociality: The sweat bee Dialictus lineatulus. Florida Entomol 69:742–754.
Eickwort GC (1975) Gregarious nesting of the mason bee Hoplitis anthocopoides and the evolution of parasitism and sociality among megachilid bees. Evolution (N Y) 29:142–150.
Eickwort GC, Eickwort JM, Gordon J, Eickwort MA (1996) Solitary behavior in a high-altitude population of the social sweat bee Halictus rubicundus (Hymenoptera: Halictidae). Behav Ecol Sociobiol 38:227–233. doi: 10.1007/s002650050236
Eickwort GC, Kukuk PF, Wesley FR (1986) The Nesting Biology of Dufourea novaeangliae (Hymenoptera : Halictidae and the Systematic Position of the Dufoureinae Based on Behavior and Development. J Kansas Entomol Soc 59:103–120.
Fellendorf M, Mohra C, Paxton RJ (2004) Devasting effects of river flooding to the ground-nesting bee, Andrena vaga (Hymenoptera: Andrenidae), and its associated fauna. J Insect Conserv 8:311–322. doi: 10.1007/s10841-004-0514-5
Flores‐Prado L, Chiappa E, Niemeyer HM (2008) Nesting biology, life cycle, and interactions between females of Manuelia postica, a solitary species of the Xylocopinae (Hymenoptera: Apidae). New Zeal J Zool 35:93–102. doi: 10.1080/03014220809510106
Freiria GA, Garófalo CA, Del Lama MA (2017) The primitively social behavior of Euglossa cordata (Hymenoptera, Apidae, Euglossini): a view from the perspective of kin selection theory and models of reproductive skew. Apidologie 48:523–532. doi: 10.1007/s13592-017-0496-4
Frison TH (1922) Notes on the life history, parasites and inquiline associates of Anthophora abrupta say, with some comparisons with the habits of certain other Anthophorinae (Hymenoptera). Trans Am Entomol Soc 48:137–156.
Garófalo CA, Camillo E, Campos MJO, Serrano JC (1992) Nest re-use and communal nesting in Microthurge corumbae (Hymenoptera, Megachilidae), with special reference to nest defense. Insectes Soc 39:301–311. doi: 10.1007/BF01323950
Houston TF (1991) Ecology and behaviour of the bee Amegilla (Asaropoda) dawsoni (Rayment) with notes on a related species (Hymenoptera: Anthophoridae). Rec West Aust Museum 15:591–609.
Kamke R, Zillikens A, Heinle S, Steiner J (2008) Natural enemies and life cycle of the orchid bee Eufriesea smaragdina (Hymenoptera: Apidae). J Kansas Entomol Soc 81:101–109.
Kapheim KM, Bernal SP, Smith AR, et al (2011) Support for maternal manipulation of developmental nutrition in a facultatively eusocial bee, Megalopta genalis (Halictidae). Behav Ecol Sociobiol 65:1179–1190. doi: 10.1007/s00265-010-1131-9
Katayama E (1994) Brood development and adult activities of a small carpenter bee, Ceratina megastigmata (Hymenoptera: Anthophoridae). Kontyû 47:139–157.
Knerer G, Mackay P (1969) Bionomic notes on the solitary Evylaeus oenotherae (Stevens) (Hymenoptera: Halictinae), a matinal summer bee visiting cultivated Onagraceae. Can J Zool 47:289–294. doi: 10.1139/z69-060
Krombein KV (1967) Trap-nesting wasps and bees: Life histories, nests and associates. Smithsonian Press, Washington, D.C.
Martins CF, Peixoto MP, Aguiar CML (2013) Plastic nesting behavior of Centris (Centris) flavifrons (Hymenoptera: Apidae: Centridini) in an urban area. Apidologie 45:156–171. doi: 10.1007/s13592-013-0235-4
Martins DC, de Albuquerque PMC, Silva FS, Rebêlo JMM (2018) Orchid bees (Apidae: Euglossini) in Cerrado remnants in northeast Brazil. J Nat Hist 52:627–644. doi: 10.1080/00222933.2018.1444210
Martins RP, de Almeida DAO (1994) Is the bee, Megachile assumptionis (Hymenoptera: Megachilidae), a cavity-nesting specialist? J Insect Behav 7:759–765. doi: 10.1007/BF01997444
Mello MLS, Vidal BC, Rozen JG (2018) Polarization microscopy and infrared microspectroscopy of integument coverings of diapausing larvae in two distantly related nonsocial bees. Microsc Microanal 24:75–81. doi: 10.1017/S1431927618000053
Michelette ERF, Camargo JMF, Rozen Jr JG (2000) Biology of the Bee Canephorula apiformis and Its Cleptoparasite Melectoides bellus: Nesting Habits, Floral Preferences, and Mature Larvae (Hymenoptera, Apidae). Am Museum Novit 3308:1–23. doi: 10.1016/0014-3057(95)00001-1
Michener CD (1966) The bionomics of a primitively social bee, Lasioglossum versatum (Hymenoptera: Halictidae). J Kansas Entomol Soc 39:193–217.
Michener CD (2007) The Bees of the World, 2nd edn. The Johns Hopkins University Press, Baltimore
Michener CD (1964) The bionomics of Exoneurella, a solitary relative of Exoneura (Hymenoptera: Apoidea: Ceratinini). Pacific Insects 6:411–426.
Michener CD, Lange RB (1958) Observations on the behavior of Brazilian Halictid bees II: Paroxystoglossa jocasta. J Kansas Entomol Soc 31:129–138.
Miyamoto S (1960) Observations on the behavior of Bombus diversus SMITH (Biological studies on Japanese Bees, XIII). Insectes Soc VII:39–56.
Miyanaga R, Maeta Y, Ito F, Adhikari RD (2017) Discovery of wood nesting by a subterranean halictine bee, Lasioglossum (Evylaeus) vulsum (Hymenoptera: Halictidae). Entomol Sci 20:156–158. doi: 10.1111/ens.12246
Mueller UG (1996) Life history and social evolution of the primitively eusocial bee Augochlorella striata (Hymenoptera: Halictidae). J Kansas Entomol Soc 69:116–138.
Neff JL, Simpson BB (1997) Nesting and Foraging Behavior of Andrena (Callandrena) rudbeckiae Robertson (Hymenoptera: Apoidea: Andrenidae) in Texas. J Kansas Entomol Soc 70:100–113.
Neff JL, Simpson BB (1992) Partial bivoltinism in a ground-nesting bee : The biology of Diadasia rinconis in Texas (Hymenoptera, Anthophoridae). J Kansas Entomol Soc 65:377–392.
Norden BB, Krombein KV, Deyrup MA, Edirisinghe JP (2003) Biology and behavior of a seasonally aquatic bee, Perdita (Alloperdita) floridensis Timberlake (Hymenoptera: Andrenidae: Panurginae). J Kansas Entomol Soc 76:236–249.
Nye WP (1980) Notes on the biology of Halictus (Halictus) farinosus Smith (Hymenoptera: Halictidae). USDA 1–29.
Ordway E (1964) Sphecodes pimpinellae and other enemies of Augochlorella (Hymenoptera:Halictidae). J Kansas Entomol Soc 37:139–152.
Parker FD, Tepedino VJ (1982) A nest and pollen-collection records of Osmia sculleni Sandhouse, a bee with hooked hairs on the Mouthparts (Hymenoptera: Megachilidae). J Kansas Entomol Soc 55:329–334.
Radmacher S, Strohm E (2010) Factors affecting offspring body size in the solitary bee Osmia bicornis (Hymenoptera, Megachilidae). Apidologie 41:169–177. doi: 10.1051/apido/2009064
Rehan SM, Richards MH (2010) Nesting biology and subsociality in Ceratina calcarata (Hymenoptera: Apidae). Can Entomol 142:65–74. doi: 10.4039/n09-056
Rehan SM, Richards MH, Schwarz MP (2009) Evidence of Social Nesting in the Ceratina of Borneo (Hymenoptera: Apidae). J Kansas Entomol Soc 82:194–209. doi: 10.2317/JKES809.22.1
Ribeiro MF, Imperatriz-Fonseca VL, Santos-Filho PS (2003) A interrupção da construção de células de cria e postura em Plebeia remota (Holmberg) (Hymenoptera, Apidae, Meliponini). In: Apoidea Neotropica: Homenagem aos 90 Anos de Jesus Santiago Moure. pp 177–188
Richards MH (2000) Evidence for geographic variation in colony social organization in an obligately social sweat bee, Lasioglossum malachurum Kirby (Hymenoptera; Halictidae). Can J Zool 78:1259–1266. doi: 10.1139/z00-064
Richards MH, Packer L (1994) Trophic aspects of caste determination in Halictus ligatus, a primitively eusocial sweat bee. Behav Ecol Sociobiol 34:385–391. doi: 10.1007/BF00167329
Roubik DW, Michener CD (1980) The Seasonal Cycle and Nests of Epicharis zonata, a Bee Whose Cells are below the Wet-Season Water Table (Hymenoptera, Anthophoridae). Biotropica 12:56–60. doi: 10.2307/2387773
Rozen Jr. JG (1977) Biology and immature stages of the bee genus Meganomia (Hymenoptera , Melittidae). Am Museum Nat Hist 2630:1–14.
Rozen Jr. JG (1989) Life history studies of the primitive Panurgine bees (Hymenoptera: Andrenidae: Panurginae). Am Museum Novit 2962:1–27.
Rozen Jr. JG (2014) Nesting Biology and Immature Stages of the Panurgine Bee Genera Rhophitulus and Cephalurgus (Apoidea: Andrenidae: Protandrenini). Am Museum Novit 3814:1–16. doi: 10.1206/3814.1
Rozen Jr. JG (1971) Biology and immature stages of Moroccan panurgine bees (Hymenoptera, Apoidea). Am Museum Novit 2457:1–37. doi: 10.1007/s13398-014-0173-7.2
Rozen Jr. JG (1993) Phylogenetic relationships of Euherbstia with other short-tongued bees (Hymenoptera: Apoidea). Am Museum Novit 3060:1–17.
Rozen Jr. JG (2008) The solitary bee Calliopsis zebrata: Biological and distributional notes and description of its larva (Hymenoptera: Andrenidae: Panurginae). Am Museum Novit 3632:1–12. doi: 10.1206/628.1
Rozen Jr. JG (1984) Nesting Biology of Diphaglossine Bees (Hymenoptera, Colletidae). Am Museum Novit 1–33. doi: 10.2174/978160805096311001010058
Rozen Jr. JG (1990) Pupa of the bee Pararhophites orobinus (Hymenoptera: Apoidea: Megachilidae). J New York Entomol Soc 98:379–382.
Rozen Jr. JG (1970) Biology, immature stages, and phylogenetic relationships of fideliine bees, with the description of a new species of Neofidelia (Hymenoptera, Apoidea). Am Museum Novit 1–25.
Rozen Jr. JG (1973) Biology notes on the bee Andrena accepta Viereck (Hymenoptera, Andrenidae). New York Entomol Soc 81:54–61.
Rozen Jr. JG (1994) Biology and Immature Stages of Some Cuckoo Bees Belonging to Brachynomadini, with Descriptions of Two New Species (Hymenoptera: Apidae: Nomadinae). Am Museum Novit 1–23.
Rozen Jr. JG (1987) Nesting biology and immature stages of a new species in the bee genus Hesperapis (Hymenoptera: Apoidea: Melittidae: Dasypodinae ). Am Museum Novit 2887:1–13.
Rozen Jr. JG, Favreau MS (1968) Biological notes on Colletes compactus compactus and its Cuckoo Bee, Epeolus pusillus (Hymenoptera: Colletidae and Anthophoridae). J New York Entomol Soc 76:106–111.
Rozen Jr. JG, Hall HG (2011) Nesting and Developmental Biology of the Cleptoparasitic Bee Stelis ater (Anthidiini) and Its Host, Osmia chalybea (Osmiini) (Hymenoptera: Megachilidae). Am Museum Novit 106:1–38.
Rozen Jr. JG, Hall HG (2012) Nesting biology and immatures of the oligolectic bee Trachusa larreae (Apoidea: Megachilidae: Anthidiini). Am Museum Novit 3765:1–24. doi: 10.1206/3765.2
Rozen Jr. JG, Hall HG (2014) Nest site selection and nesting behavior of the bee Lithurgopsis apicalis (Megachilidae: Lithurginae). Am Museum Novit 3796:1–24. doi: 10.1206/3796.1
Rozen Jr. JG, Snelling RR (1986) Ethology of the bee Exomalopsis nitens and its cleptoparasite (Hymenoptera: Anthophoridae). J New York Entomol Soc 94:480–488.
Rust RW (1988) Biology of Nomadopsis larreae (Hymenoptera: Andrenidae), with an analysis of yearly appearance. Ann Entomol Soc Am 81:199–104.
Rust RW, Clement SL (1972) The biology of Osmia glauca and Osmia nemoris (Hymenoptera: Megachilidae). J Kansas Entomol Soc 45:523–528.
Sadd BM, Barribeau SM, Bloch G, et al (2015) The genomes of two key bumblebee species with primitive eusocial organization. Genome Biol 16:16–76. doi: 10.1186/s13059-015-0623-3
Sakagami SF, Fukuda H (1972) Life of a japanese eusocial Halictine bee, Lasioglossum duplex, out of brood rearing season (Hymenoptera, Halictidae). Insectes Soc XlX:137–152.
Sakagami SF, Kouta S (1958) An attempt to rear the Japanese Bee in a framed hive：(Studies on the Japanese Honeybee, Apis cerana cerana Fabr., Ⅳ). J Fac Sci Hokkaido Univ 14:1–8.
Sakagami SF, Maeta Y (1984) Multifemale nests and rudimentary castes in the normally solitary bee Ceratina japonica (Hymenoptera: Xylocopinae). J Kansas Entomol Soc 57:639–656.
Shebl MA, Hassan HA, Kamel SM, et al (2018) Biology of the mason bee Osmia latreillei (Hymenoptera: Megachilidae) under artificial nesting conditions in Egypt. J Asia Pac Entomol 21:754–759. doi: 10.1016/j.aspen.2018.05.008
Sihag RC (1993) Behaviour and ecology of the subtropical carpenter bee, Xylocopa fenestrata F. 8. Life cycle, seasonal mortality, parasites and sex ratio. J Apic Res 32:109–114. doi: 10.1080/00218839.1993.11101295
Stockhammer KA (1966) Nesting habits and life cycle of a swet bee, Augochlora pura (Hymenoptera: Halictidae). Kansas Entomol Soc 39:157–192.
Stockhammer KA (1967) Some notes on the biology of the blue sweat bee, Lasioglossum coeruleum (Apoidea: Halictidae). J Kansas Entomol Soc 40:177–189.
Torchio PF (1975) The biology of Perdita nuda and descriptions of its immature forms and those of its Sphecodes parasite (Hymenoptera: Apoidea). Kansas Entomol Soc 48:257–279.
Torchio PF (1971) The biology of Anthophora (Micranthophora) peritomae (Hymenoptera: Apoidea, Anthophoridae). Contrib Sci 206:1–14.
Torchio PF, Tepedino VJ (1982) Parsivoltinism in three species of Osmia bees. Psyche (Stuttg) 89:221–238. doi: 10.1155/1982/60540
Ulrich Y, Perrin N, Chapuisat M (2009) Flexible social organization and high incidence of drifting in the sweat bee, Halictus scabiosae. Mol Ecol 18:1791–1800. doi: 10.1111/j.1365-294X.2009.04154.x
Van Nerum K, Buelens H (1997) Hypoxia-controlled winter metabolism in honeybees (Apis mellifera). Comp Biochem Physiol 117:445–455. doi: 10.1016/S0300-9629(96)00082-5
Xu J, Strange JP, Welker DL, James RR (2013) Detoxification and stress response genes expressed in a western North American bumble bee, Bombus huntii (Hymenoptera: Apidae). BMC Genomics 14:874. doi: 10.1186/1471-2164-14-874
Yagi N, Hasegawa E (2012) A halictid bee with sympatric solitary and eusocial nests offers evidence for Hamilton’s rule. Nat Commun 3:937–939. doi: 10.1038/ncomms1939
Yanega D (1988) Social plasticity and early-diapausing females in a primitively social bee. Proc Natl Acad Sci 85:4374–4377. doi: 10.1073/pnas.85.12.4374
Yanega D (1989) Caste determination and differential diapause within the first brood of Halictus rubicundus in New York (Hymenoptera: Halictidae). Behav Ecol Sociobiol 24:97–107. doi: 10.1007/BF00299641
Yoon HJ, Lee KY, Kim MY, et al (2013) Optimal Cold Temperature for the Artificial Hibernation of Bombus ignitus Queen Bumblebees. Int J Ind Entomol 26:124–130. doi: 10.7852/ijie.2013.26.2.124
Zillikens A, Steiner J (2004) Nest architecture, life cycle and cleptoparasite of the Neotropical leaf-cutting bee Megachile (Chrysosarus) pseudanthidioides Moure (Hymenoptera: Megachilidae). J Kansas Entomol Soc 77:193–202.
